1  
2  
3  
4  
5  
6  
7  
8  
9  
10  
11  
12  
13  
14  
15  
16  
17  
18  
19

**The *Drosophila melanogaster* enzyme glycerol-3-phosphate dehydrogenase 1 is required for oogenesis, embryonic development, and amino acid homeostasis**

Madhulika Rai<sup>1</sup>, Sarah M. Carter<sup>1</sup>, Shefali Shefali<sup>1</sup>, Nader H. Mahmoudzadeh<sup>1</sup>, Robert Pepin<sup>2</sup>, and Jason M. Tennessen<sup>1§</sup>

<sup>1</sup>Department of Biology, Indiana University, Bloomington, IN 47405, USA

<sup>2</sup>Department of Chemistry, Indiana University, Bloomington, IN, 47405, USA

§ Correspondence: [jtenness@indiana.edu](mailto:jtenness@indiana.edu)

Keywords: *Drosophila*, metabolomics, glycerol-3-phosphate dehydrogenase, amino acid metabolism

20 **ABSTRACT**

21           As the fruit fly, *Drosophila melanogaster*, progresses from one life stage to the next, many  
22 of the enzymes that compose intermediary metabolism undergo substantial changes in both  
23 expression and activity. These predictable shifts in metabolic flux allow the fly meet stage-specific  
24 requirements for energy production and biosynthesis. In this regard, the enzyme Glycerol-3-  
25 phosphate dehydrogenase (GPDH1) has been the focus of biochemical genetics studies for several  
26 decades, and as a result, is one of the most well characterized *Drosophila* enzymes. Among the  
27 findings of these earlier studies is that GPDH1 acts throughout the fly lifecycle to promote  
28 mitochondrial energy production and triglyceride accumulation while also serving a key role in  
29 maintaining redox balance. Here we expand upon the known roles of GPDH1 during fly  
30 development by examining how depletion of both the maternal and zygotic pools of this enzyme  
31 influences development, metabolism, and viability. Our findings not only confirm previous  
32 observations that *Gpdh1* mutants exhibit defects in larval development, lifespan, and fat storage  
33 but also reveal that GPDH1 serves essential roles in oogenesis and embryogenesis. Moreover,  
34 metabolomics analysis reveals that a *Gpdh1* mutant stock maintained in a homozygous state  
35 exhibits larval metabolic defects that significantly differ from those observed in the F1 mutant  
36 generation. Overall, our findings highlight unappreciated roles for GPDH1 in early development  
37 and uncover previously undescribed metabolic adaptations that could allow flies to survive loss of  
38 this key enzyme.

## 39 **INTRODUCTION**

40           The *Drosophila* enzyme GPDH1 (encoded by FBgn0001128) is an ideal model for  
41 understanding how metabolism adapts to the biosynthetic and energetic requirements of animal  
42 development. Although the reaction catalyzed by GPDH1 is relatively simple (Figure 1), the  
43 activity and purpose of the enzyme varies significantly during development. For example, GPDH1  
44 is highly expressed in both the larval fat body and adult flight muscle but has opposite functions  
45 within the two tissues. The larval fat body displays high levels of GPDH1 activity and relies on  
46 this enzyme to generate glycerol-3-phosphate (G3P; Figure 1), which is used in triglyceride  
47 synthesis (TAG) (RECHSTEINER 1970; SULLIVAN *et al.* 1983; MERRITT *et al.* 2006; LI *et al.* 2019).  
48 Meanwhile, GPDH1 in adult flight muscle functions in conjunction with the mitochondrial enzyme  
49 GPO1 to shuttle electrons into the electron transport chain for ATP synthesis (SACKTOR AND DICK  
50 1962; O'BRIEN AND MACINTYRE 1972b; O'BRIEN AND MACINTYRE 1972a; WOJTAS *et al.* 1997;  
51 MERRITT *et al.* 2006), thus supporting the intense energy demands of insect flight (Figure 1).

52           The distinct functions of GPDH1 within the larval fat body and adult flight muscles  
53 illustrate why this enzyme serves as a model for understanding how metabolism is coordinately  
54 regulated in the context of animal growth, development, and physiology. Nearly fifty years of  
55 intensive biochemical and genetic studies revealed that GPDH1 kinetics, stability, and physical  
56 characteristics vary dramatically between the larval and adult enzyme pool and that GPDH1  
57 activity fluctuates as a function of developmental time, with activity levels peaking in L3 larvae  
58 and in adults (WRIGHT AND SHAW 1969; RECHSTEINER 1970; O'BRIEN AND MACINTYRE 1972a;  
59 SULLIVAN *et al.* 1983). These biochemical studies, coupled with decades of genetic analysis  
60 (O'BRIEN AND MACINTYRE 1972b; O'BRIEN AND SHIMADA 1974; BEWLEY *et al.* 1980; KOTARSKI  
61 *et al.* 1983; BURKHART *et al.* 1984; DAVIS AND MACINTYRE 1988; GIBSON *et al.* 1991;

62 YAMAGUCHI *et al.* 1994; MERRITT *et al.* 2006; CARMON *et al.* 2010; LI *et al.* 2019), make GPDH1  
63 among the most intensively studied enzymes in developmental biology and provide insight  
64 towards how normal animal development relies on dramatic changes in enzyme activity.

65         Despite *Gpdh1* serving as the subject of dozens of biochemical genetic studies, one pool  
66 of GPDH1 remains largely overlooked. *Drosophila* embryos contain a significant amount of  
67 maternally-loaded GPDH1 that potentially persists into larval development (WRIGHT AND SHAW  
68 1969; WRIGHT AND SHAW 1970; CASAS-VILA *et al.* 2017). Yet, nearly all *Gpdh1* mutant studies  
69 only examine zygotic mutants, raising the possibility that novel GPDH1 functions could be  
70 discovered by examining mutants lacking the maternal enzyme pool. Here we address this  
71 possibility by examining the metabolic and developmental defects displayed by maternal-zygotic  
72 (M/Z) *Gpdh1* mutants. Our analysis reveals GPDH1 is not only required for normal oocyte  
73 development but also that loss of the maternal GPDH1 pool leads to a significant embryonic lethal  
74 phenotype. In contrast, among those *Gpdh1* M/Z mutants that survive the embryonic lethal phase,  
75 post-embryonic development and adult longevity appears similar between zygotic and M/Z *Gpdh1*  
76 mutants. During our studies, however, we made the unexpected discovery that the homozygous  
77 *Gpdh1* mutant stock used to study loss of the maternal GPDH1 enzyme pools exhibited striking  
78 differences in the steady state levels of amino acids and tricarboxylic acid (TCA) metabolites when  
79 compared with the control strain and F1 mutant generation. These unexpected findings provide  
80 insight towards understanding how *Drosophila* metabolism is rewired to support the complete loss  
81 of a major enzyme involved in central carbon metabolism.

## 82 **METHODS**

### 83 ***Drosophila melanogaster* husbandry and genetics**

84 Fly stocks were maintained on Bloomington *Drosophila* Stock Center (BDSC) food at 25°C. The  
85 *Gpdh1<sup>A10</sup>* mutant strain was described in a previous study from our lab (LI *et al.* 2019). For all the  
86 experiments, 50 adult virgins were mated with 25 males and the embryos were collected on  
87 molasses agar plates with yeast paste for 4 hours, as previously described (LI AND TENNESSEN  
88 2017). *Gpdh1<sup>A10</sup>* zygotic mutant larvae were collected by crossing *Gpdh1<sup>A10</sup>/CyO*,  
89 *P{w[+mC]=GAL4-twi.G}2.2*, *P{w[+mC]=UAS-2xEGFP}AH2.2* males and females and selecting  
90 for larvae lacking GFP expression. The *Gpdh1* maternal-zygotic mutant stock was established by  
91 crossing *Gpdh1<sup>A10</sup>* zygotic mutant males and females.

92

### 93 **Ovaries dissection and imaging**

94 Ovaries were dissected from *Gpdh1<sup>A10/+</sup>*, *Gpdh1<sup>A10</sup> (Z)* and *Gpdh1<sup>A10</sup> (M/Z)* females that were  
95 raised on yeast. Ovaries were fixed with 4% formaldehyde, rinsed twice with phosphate buffer  
96 saline (PBS, pH 7.4), stained with DAPI for 30 minutes, and mounted on slides using vector shield  
97 with DAPI (Vector Laboratories; H-1200-10). Slides were imaged using a Leica SP8 confocal  
98 microscope.

99

### 100 **Fecundity analysis**

101 Twenty virgin females from *Gpdh1<sup>A10/+</sup>* (control), *Gpdh1<sup>A10</sup> (Z)* and *Gpdh1<sup>A10</sup> (M/Z)* were mated  
102 with ten *w<sup>1118</sup>* males in a small mating chamber. The total number of eggs laid during a two-hour  
103 period was quantified for each mating chamber.

104

## 105 **Viability assays**

106 Embryonic viability of *Gpdh1<sup>A10/+</sup>*, *Gpdh1<sup>A10</sup> (Z)*, and *Gpdh1<sup>A10</sup> (M/Z)* genotypes were  
107 conducted by crossing 50 female virgins with 25 males in an egg-laying bottle that contained a  
108 molasses agar plate partially covered with yeast paste (see LI AND TENNESSEN 2017). The egg-  
109 laying plate was replaced every 24 hours for two days, after which time a fresh egg-laying plate  
110 was placed in the bottle and eggs were collected for two hours. The egg-laying plate was removed,  
111 and following an 8 hour incubation at 25°C to allow for onset of GFP expression from the balancer  
112 chromosomes, thirty non-GFP embryos were identified by circling the surrounding agar with a  
113 dissecting needle. The number of eggs that hatched to become L1 larvae was recorded 24 hours  
114 later.

115 Larval viability was measured by placing 20 synchronized embryos of each genotype on  
116 molasses agar plates with yeast paste and measuring time until pupariation. Pupae were  
117 subsequently transferred into a glass vial containing BDSC food and monitored until eclosion.

118

## 119 **Longevity assay**

120 Virgin female and male adults of the indicated genotypes were separated into glass vials (n = 10  
121 adults/vial) and maintained at 25°C. Flies were transferred to fresh vials every 5 days without the  
122 use of carbon dioxide. The number of dead adults in each vial was recorded daily.

123

## 124 **Fat body staining**

125 Mid-L2 larval fat bodies were fixed and stained as previously described (TENNESSEN *et al.* 2014a).  
126 Briefly, fat bodies were fixed with 4% formaldehyde, rinsed twice with PBS, once with 50%  
127 ethanol, and then stained for 2 minutes at room temperature using filtered 0.5% Solvent Black 3

128 (CAS Number 4197-25-5; Sigma 199664) dissolved in 75% ethanol. Samples were sequentially  
129 rinsed with 50% ethanol, 25% ethanol, and PBS. Stained tissues were mounted on a microscope  
130 slide with vector shield with DAPI (Vector Laboratories; H-1200-10).

131

### 132 **Gas Chromatography-Mass Spectrometry (GC-MS) analysis**

133 GC-MS analysis was performed at the Indiana University Mass Spectrometry Facility as  
134 previously described (LI AND TENNESSEN 2018). All samples contained 25 mid-L2 larvae and six  
135 biological replicates were analyzed per genotype. GC-MS data was normalized based on sample  
136 mass and an internal succinic-d4 acid standard that was present within the extraction buffer. Data  
137 were analyzed using Metaboanalyst version 5.0 following log transformation (base 10) and Pareto  
138 Scaling (PANG *et al.* 2021).

139

### 140 **Adult body mass measurements**

141 Ten adult male or female flies were collected one day post-eclosion, placed into pre-tared 1.5 mL  
142 microfuge tubes, and the mass was measured using a Mettler XS 105 weighing analytical balance.  
143 Six independent samples were measured per genotype.

144

### 145 **Statistical Analysis**

146 Unless noted, statistical analysis was conducted using GraphPad Prism v9.1. Data are presented as  
147 scatter plots, with error bars representing the standard deviation and the line in the middle  
148 representing the mean value. Unless noted, data was compared using a Kruskal-Wallis test  
149 followed by a Dunn's multiple comparison test. Longevity data was analyzed using a log-rank  
150 (Mantel-Cox) test.

151

## 152 **RESULTS AND DISCUSSION**

### 153 **GPDH1 is required for oogenesis and embryonic viability**

154 Previous studies indicate that GPDH1 is expressed in the ovary and maternally loaded into  
155 the egg (WRIGHT AND SHAW 1969; WRIGHT AND SHAW 1970; CASAS-VILA *et al.* 2017).  
156 Considering that homozygous *Gpdh1* mutant strains are reported to be sub-viable (O'BRIEN AND  
157 MACINTYRE 1972b; O'BRIEN AND SHIMADA 1974; KOTARSKI *et al.* 1983; MERRITT *et al.* 2006),  
158 we examined the possibility that GPDH1 serves essential roles during early development that have  
159 been previously overlooked. As a first step towards testing this possibility, we dissected the ovaries  
160 from the homozygous *Gpdh1<sup>A10</sup>* mutant flies – both from F1 mutants (generated by crossing  
161 *Gpdh1<sup>A10</sup>/CyO*, *twi-GFP* parents and selecting for GFP<sup>-</sup> larvae), as well as from a homozygous  
162 *Gpdh1<sup>A10</sup>* mutant strain (designated *M/Z* to indicate a complete absence of enzyme during  
163 development). We found that the ovaries from both F1 *Gpdh1<sup>A10</sup>* females and *Gpdh1<sup>A10</sup> M/Z*  
164 females were smaller than those observed in control females and contained fewer late-stage  
165 ovarioles (Figure 2A-C). Notably, we regularly observed degenerating egg chambers in mutant  
166 embryos (See Figure 2B, arrow), indicating that loss of GPDH1 in females limits oocyte  
167 production. Consistent with the observed egg chamber defects, both classes of *Gpdh1* mutants  
168 exhibit significant decreases in egg-laying as compared with controls (Figure 2D).

169 As a complement to our studies of oogenesis, we also examined if the maternal and zygotic  
170 GPDH1 enzyme pools are required for embryonic development. Females of a control strain  
171 (*Gpdh1<sup>A10/+</sup>*), F1 *Gpdh1* mutants (*Gpdh1<sup>A10</sup>*) and the *Gpdh1* mutant strain (*Gpdh1<sup>A10</sup> M/Z*) were  
172 crossed with either *w<sup>1118</sup>* controls or *Gpdh1<sup>A10</sup>* mutant males and the resulting offspring were  
173 scored for the percentage of embryos that hatched to first instar larvae (L1). We observed that  
174 embryos from *Gpdh1* mutant mothers of either genetic background died at a significantly higher



175 rate than those produced by heterozygous control mothers, regardless of the parental genotype  
176 (Figure 2E), indicating that both the maternal and zygotic GPDH1 pools are required during  
177 embryogenesis. Overall, our findings that *Gpdh1* mutants display oogenesis defects and embryonic  
178 lethality explains why *Gpdh1* mutant females exhibit such low levels of fecundity when compared  
179 with control strains.

180

181 **Zygotic and Maternal-Zygotic *Gpdh1* mutants display similar defects during larval**  
182 **development and adult longevity**

183 The observed requirement for maternal GPDH1 in embryogenesis led us to reevaluate if  
184 loss of this enzyme pool also influences development and lifespan in later life stages. Like previous  
185 reports of *Gpdh1* zygotic mutants, we found the *Gpdh1* M/Z mutant larvae develop more slowly  
186 than heterozygous controls and ~20% fail to initiate metamorphosis (Figure 3A). These  
187 developmental delay phenotypes, however, are indistinguishable from *Gpdh1* zygotic mutants  
188 (Figure 3A). Moreover, *Gpdh1* M/Z mutants eclose at the same rate as zygotic mutants (Figure  
189 3B). The only observable difference between the zygotic and M/Z mutants is that newly eclosed  
190 *Gpdh1* M/Z mutants females exhibit slightly increased body mass (Figure 3C), however, we are  
191 unable to rule out the possibility that this phenotype is due to differences in genetic background.

192 As a complement to our studies of larval development, we also examine the viability of  
193 *Gpdh1* mutant adults. Here too, we observe little difference between F1 *Gpdh1* mutants and M/Z  
194 mutants. Consistent with earlier findings (MERRITT *et al.* 2006), we observed that both the  
195 *Gpdh1*<sup>A10</sup> zygotic mutant females and M/Z mutant females are short-lived when compared with a  
196 heterozygous controls strain, with a majority mutant animals dying within two weeks of eclosion  
197 (Figure 4A). However, we observed that the short lifespan phenotype was milder in F1 *Gpdh1*<sup>A10</sup>

198 mutant males and absent in the *Gpdh1<sup>A10</sup> M/Z* mutant males (Figure 4B). The observed decrease  
199 in female *Gpdh1* lifespan is apparent while maintaining the maternal-zygotic stock on  
200 Bloomington *Drosophila* Stock Center food. Although bottles of the *Gpdh1<sup>A10</sup> M/Z* mutant strain  
201 contains approximately equal ratios of males:females two days after eclosion, this ratio becomes  
202 significantly skewed two weeks post-eclosion due to females dying earlier than male mutants  
203 (Figure 4C). Overall, our findings reveal that nearly all growth, development, and viability  
204 phenotypes exhibited by the *Gpdh1<sup>A10</sup> M/Z* mutants are no more severe than those observed in the  
205 F1 *Gpdh1<sup>A10</sup>* mutants.

206

### 207 ***Gpdh1* zygotic mutants and maternal-zygotic mutants exhibit significant differences in** 208 **amino acid metabolism**

209 Larval development is able to compensate for loss of zygotic GPDH1 by inducing  
210 compensatory changes in central carbon metabolism, rendering *Gpdh1* mutants dependent on LDH  
211 and GPO1 activity while also inducing significant changes in redox balance and steady-state amino  
212 acid levels (DAVIS AND MACINTYRE 1988; LI *et al.* 2019). These earlier metabolic studies were  
213 conducted by crossing males and females from a heterozygous *Gpdh1/CyO,twi-GFP* stock and  
214 selecting for homozygous offspring, thus providing a readout of how loss of zygotic GPDH1  
215 affects larval metabolism. In this regard, our homozygous *Gpdh1 M/Z* mutant strain provides a  
216 unique opportunity to determine if loss of both the maternal and zygotic enzyme pools induce a  
217 distinct metabolic profile when compared with zygotic mutants. Towards this goal, we first  
218 examined larval triglyceride (TAG) levels in the heterozygous control, F1 *Gpdh1* mutant, and the  
219 homozygous *Gpdh1 M/Z* strain. Consistent with previous studies (MERRITT *et al.* 2006), we  
220 observed similar decreases in fat body TAG levels of the *Gpdh1<sup>A10</sup>* zygotic and *Gpdh1<sup>A10</sup> M/Z*

221 mutant larvae when compared with *Gpdh1*<sup>A10/+</sup> heterozygous controls (Figure 5A-C). These results  
222 indicate that loss of the maternal GPDH1 pool does not exacerbate the *Gpdh1* TAG mutant  
223 phenotype.

224 We next used a targeted GC-MS-based approach to compare the levels of amino acids,  
225 TCA cycle intermediates, and glycolytic end products in mid-L2 larvae of *Gpdh1*<sup>A10/+</sup>  
226 heterozygous controls, *Gpdh1*<sup>A10</sup> zygotic mutants, and *Gpdh1*<sup>A10</sup> M/Z mutants (Table S1). When  
227 the resulting metabolomics data was analyzed using principal component analysis, the *Gpdh1*<sup>A10</sup>  
228 M/Z mutant samples clearly separated from both the *Gpdh1*<sup>A10</sup> zygotic mutants and the *Gpdh1*<sup>A10/+</sup>  
229 heterozygous controls (Figure 6A), suggesting that the three genotypes have distinct metabolic  
230 profiles. A closer analysis of the datasets revealed that the changes observed in *Gpdh1*<sup>A10</sup> zygotic  
231 mutant larvae mimic those observed previously (Li *et al.* 2019) – G3P levels were significantly  
232 decreased in relative to the control strain (Figure 6B,C) and both lactate and 2-hydroxyglutarate  
233 remained at comparable levels (Figure 6B, D, E). The relative abundance of some amino acids and  
234 TCA cycle intermediates were also decreased in the zygotic *Gpdh1* mutant larvae compared with  
235 *Gpdh1*<sup>A10/+</sup> controls (Figure 6B,F,G,H).

236 While the metabolite changes observed in *Gpdh1* zygotic mutants largely confirmed  
237 previous studies, the metabolic profile of the *Gpdh1*<sup>A10</sup> M/Z mutants exhibited striking differences.  
238 Even though G3P, lactate, and 2-hydroxyglutamate levels were comparable between the two mutant  
239 genotypes (Figure 6B-E), many of the same amino acids that were either decreased or unchanged  
240 in the zygotic mutants were significantly elevated in the M/Z mutant background (Figure 6B, F-  
241 H). For example, relative to the control strain, tyrosine and  $\beta$ -alanine were decreased by 40% and  
242 30%, respectively, in zygotic mutants but increased by 40% and 25% in the maternal-zygotic  
243 mutant (Figure 6G,H). A similar trend was observed with the TCA intermediates succinate,

244 fumarate, and malate (Figure 6B), with the relative abundance of malate exhibiting a ~15%  
245 decrease in zygotic mutants and a 25% increase in maternal-zygotic mutants when compared to  
246 the heterozygous control strain. The results are notable because they support a previously  
247 published hypothesis that *Gpdh1* mutants experience compensatory changes in malate metabolism  
248 (MERRITT *et al.* 2006). Overall, our results reveal that a strain lacking both the maternal and zygotic  
249 GPDH1 enzyme pool exhibit changes in the steady-state levels of amino acid and TCA cycle  
250 intermediates that are opposite of those observed in mutants lacking only the zygotic enzyme  
251 contribution. Future studies should determine if these changes are due to either genetic selection  
252 when establishing the homozygous *Gpdh1* mutant stock or directly result from loss of the maternal  
253 GPDH1 enzyme pool.

254

255

## 256 **DISCUSSION**

257           Here we demonstrate the *Drosophila* enzyme GPDH1 serves essential roles in both  
258 oogenesis and embryogenesis. Our findings expand the known roles for GPDH1 and raise  
259 questions as to what function this enzyme serves during early development. Considering that the  
260 purpose of GPDH1 activity differs in a context specific manner (*e.g.*, TAG synthesis in fat body,  
261 ATP production in flight muscle), our findings raise the question as to the function of GPDH1 in  
262 these developmental contexts. Moreover, G3P levels are known to increase over the course of  
263 embryogenesis (TENNESSEN *et al.* 2014b), suggesting that this compound serves a unique role in  
264 the developing embryo.

265           Our findings also demonstrate that larvae lacking both maternal and zygotic GPDH1  
266 activity exhibit developmental phenotypes that are largely indistinguishable from *Gpdh1* zygotic  
267 mutants. However, targeted metabolomics analysis indicates that *Gpdh1* M/Z mutants exhibit  
268 metabolic phenotypes that are more severe than the zygotic mutants, raising the question as to how  
269 loss of maternal enzyme pool can influence the larval metabolic program in such a dramatic  
270 manner. While we can't rule out the possibility that maternal GPDH1 activity establishes a  
271 metabolic state in the embryo that persists into larval development, a more likely explanation stems  
272 from the fact that oogenesis and embryogenesis are energetic processes that impose intense  
273 demands on cellular metabolism. As a result, generation of the homozygous *Gpdh1* mutant strain  
274 would inevitably select for background mutations that compensate for loss of GPDH1 activity in  
275 the ovary and embryos – a hypothesis that is supported by previous observations. For example,  
276 even though GPDH1 is essential for maintaining ATP production in flight muscle (O'BRIEN AND  
277 MACINTYRE 1972b; WOJTAS *et al.* 1997; MERRITT *et al.* 2006), *Gpdh1* mutants slowly regain the  
278 ability to fly when maintained in lab culture (O'BRIEN AND SHIMADA 1974), indicating that other

279 metabolic processes must be able to compensate for loss of GPDH1 activity. Similarly, *Gpdh1*  
280 larvae only exhibit slight developmental delays despite displaying a significant disruption in redox  
281 balance. This ability of larvae to maintain a somewhat normal growth rate in the absence of  
282 GPDH1 depends on the enzymes LDH and GPO1, as loss of either enzyme in a *Gpdh1* mutant  
283 background enhances the mutant phenotype (DAVIS AND MACINTYRE 1988; LI *et al.* 2019). These  
284 earlier studies, combined with our findings and previous observations that *Gpdh1* phenotypes are  
285 highly dependent on genetic background (MERRITT *et al.* 2006), indicate that GPDH1 functions  
286 within a complex and highly adaptable metabolic network that warrants further study.

287       Regardless of the reason for why *Gpdh1* maternal-zygotic mutants exhibit significant  
288 metabolic differences when compared with zygotic mutants, our study highlights a poorly  
289 understood relationship between G3P and amino acid metabolism. While we are unsure as to the  
290 significance of this metabolic relationship in the fly, our findings are consistent with studies of a  
291 mouse model of GPD1 deficiency, which induces compensatory amino acid metabolism during  
292 fasting in mice (SATO *et al.* 2016). One intriguing possibility is that the *Gpdh1* maternal-zygotic  
293 mutants induce changes in one of the central metabolic regulating pathways that control amino  
294 acid metabolism. In this regard, the amino acid sensor Tor is not only known to regulate the yeast  
295 glycerol-3-phosphate dehydrogenase 1 activity in yeast (LEE *et al.* 2012), but the GPDH1  
296 substrate, DHAP (see Figure 1), but also activates Tor in mammalian cell culture (OROZCO *et al.*  
297 2020). These correlations between *Gpdh1* and Tor should be the subject of future investigations.

298       Our studies also revealed changes in the relative abundance of a subset of TCA acid cycle  
299 intermediates. These observations suggest that mitochondrial metabolism in *Gpdh1* maternal-  
300 zygotic mutants is fundamentally altered when compared with controls and zygotic mutants.  
301 Considering that GPDH1 is an essential enzyme in the G3P shuttle, which shuttles electrons to the

302 mitochondria for ATP production (Figure 1), the observed increases in succinate, fumarate, and  
303 malate hint at the possibility that maternal-zygotic mutants exhibit significant changes in  
304 mitochondrial metabolism. However, since we observe no changes in the relative abundance of  
305 alanine, lactate, and 2-hydroxyglutarate, which are commonly elevated in flies that experience  
306 disruption of mitochondrial activity (FEALA *et al.* 2007; COQUIN *et al.* 2008; CAMPBELL *et al.*  
307 2019; MAHMOUDZADEH *et al.* 2020), the significance of these changes in *Gpdh1* maternal-zygotic  
308 mutant remain unclear.

309 Overall, our results again emphasize that GPDH1 serves a unique role in *Drosophila*  
310 metabolism. The studies presented herein both confirms a large body of literature regarding the  
311 role of GPDH1 in physiology, development, and lifespan and reveals new roles for this enzyme in  
312 oogenesis, embryogenesis, and amino acid metabolism. Moreover, considering that several studies  
313 hint at a key role for human GPD1 in cancer metabolism (ZHOU *et al.* 2017; RUSU *et al.* 2019; LIU  
314 *et al.* 2021; XIA *et al.* 2021), our findings highlight the need to better understand how this highly  
315 studied enzyme influences gene expression, cell growth and differentiation, and metabolic  
316 signaling networks.

317

318 **ACKNOWLEDGMENTS**

319 We thank the Bloomington *Drosophila* Stock Center (NIH P40OD018537) for providing fly  
320 stocks, the *Drosophila* Genomics Resource Center (NIH 2P40OD010949) for genomic reagents,  
321 and Flybase (NIH 5U41HG000739) and the Indiana University Light Microscopy Imaging Center.  
322 Targeted GC-MS analysis was conducted using instruments housed in the Indiana University Mass  
323 Spectrometry Facility, which is supported, in part, by NSF MRI Award 1726633. J.M.T. is  
324 supported by the National Institute of General Medical Sciences of the National Institutes of Health  
325 under a R35 Maximizing Investigators' Research Award (MIRA; 1R35GM119557).

326



327 **FIGURE LEGENDS**

328 **Figure 1. GPDH1 promotes cytosolic redox balance, ATP production, and TAG**  
329 **accumulation.** A schematic diagram illustrating the role of GPDH1 in central carbon metabolism.  
330 GPDH1 relies on the cofactor NAD<sup>+</sup>/NADH to interconvert the glycolytic intermediate  
331 dihydroxyacetone phosphate (DHAP) to glycerol 3-phosphate (G3P). In *Drosophila* larvae, the  
332 GPDH1-dependent conversion of DHAP to G3P functions in parallel with Lactate Dehydrogenase  
333 (LDH) to maintain redox balance. G3P is used as a precursor for TAG synthesis and functions in  
334 the G3P electron shuttle to transfer reducing equivalents to the electron transport chain. In adult  
335 flight muscle, GPDH1 function in conjunction with GPO1 and the tricarboxylic acid (TCA) cycle  
336 to generate the ATP required for flight. Abbreviations: dihydroxyacetone phosphate (DHAP),  
337 glyceraldehyde-3-phosphate (GA3P), glycerol-3-phosphate (G3P), glycerol-3-phosphate  
338 dehydrogenase (GPDH1), glycerophosphate oxidase 1 (GPO1), lactate dehydrogenase (LDH),  
339 mitochondrial pyruvate carrier 1 (MPC1), pyruvate dehydrogenase (PDH), tricarboxylic acid  
340 (TCA).

341

342 **Figure 2. *Gpdh1* is required for oocyte development and embryonic viability.** (A-C) Ovaries  
343 were dissected from 3-day old females and stained with DAPI. When compare to the *Gpdh1*<sup>A10/+</sup>  
344 control strain (A), the ovaries of (B) F1 generation *Gpdh1*<sup>A10</sup> mutants and (C) *Gpdh1*<sup>A10</sup> M/Z  
345 mutants display (B,C) fewer later stage oocytes and (B) degenerating egg chambers (see arrow).  
346 (D) The fecundity of F1 generation *Gpdh1*<sup>A10</sup> mutants and *Gpdh1*<sup>A10</sup> M/Z mutants are significantly  
347 decreased when compared with controls. (E) Embryos produced by either F1 generation *Gpdh1*<sup>A10</sup>  
348 mutants or *Gpdh1*<sup>A10</sup> M/Z mutants exhibit significant mortality when compared with the controls

349 and independent of paternal genotype. \* $P < 0.05$ . \*\* $P < 0.01$ . \*\*\* $P < 0.001$ .  $P$ -values calculated  
350 using a Kruskal-Wallis tests followed by a Dunn's test.

351

352 **Figure 3. *Gpdh1* zygotic and *Gpdh1* maternal-zygotic mutants exhibit similar developmental**

353 **delays.** *Gpdh1*<sup>A10/+</sup> controls, F1 generation *Gpdh1*<sup>A10</sup> mutants, and *Gpdh1*<sup>A10</sup> M/Z mutants were

354 analyzed for (A) time from egg-laying to pupariation, (B) time from egg-laying to eclosion, and

355 (C) body mass one day after eclosion. For (B), the % eclosion value represents the percent of pupae

356 that successfully eclosed and does not include the 20% of larvae that failed to pupariate. \*\* $P <$

357 0.01.  $P$ -values calculated using a Kruskal-Wallis tests followed by a Dunn's test.

358

359 **Figure 4. *Gpdh1* mutant females are short-lived.** The lifespan of (A) females and (B) males

360 from *Gpdh1*<sup>A10/+</sup> heterozygous controls, F1 generation *Gpdh1*<sup>A10</sup> mutants, and a *Gpdh1*<sup>A10</sup> M/Z

361 mutant strain were analyzed for 80 days after eclosion. Longevity data was analyzed using a log-

362 rank (Mantel-Cox) test. (C) Ratio of males to females in culture bottles either 2 or 14 days after

363 eclosion. \* $P < 0.05$ .  $P$ -values calculated using an unpaired t-test.

364

365 **Figure 5. TAG levels are significantly decreased in *Gpdh1* mutants.** Representative images of

366 mid-L2 fat bodies stained with Black Solvent 2 and imaged using bright field microscopy. When

367 compared with (A) heterozygous *Gpdh1*<sup>A10/+</sup> control, both (B) F1 generation *Gpdh1*<sup>A10</sup> mutants

368 (C) a *Gpdh1*<sup>A10</sup> M/Z mutant strain exhibit a similar decrease in lipid levels.

369

370 **Figure 6. Metabolomic analysis of *Gpdh1* zygotic and *Gpdh1* maternal-zygotic mutants.**

371 A targeted GC-MS-based metabolomics method was used to compare the relative abundance of  
372 G3P, lactate, 2HG and amino acids, between heterozygous *Gpdh1*<sup>A10/+</sup> controls, *Gpdh1*<sup>A10</sup>  
373 zygotic mutants and *Gpdh1*<sup>A10</sup> maternal-zygotic mutants. (A) PCA plot showing that the control,  
374 F1 generation *Gpdh1* mutants (*Z*), and the *Gpdh1* *M/Z* mutant strain separate clearly in their  
375 metabolomic profile. (B) Heatmap showing the increase in the relative abundance of amino acids  
376 in *Gpdh1* *M/Z* mutants when compared to the F1 generation *Gpdh1* zygotic mutants and the  
377 *Gpdh1*<sup>A10/+</sup> controls. (C-H) The relative abundance of (C) G3P, (D) lactate, and (E) 2HG, (F)  
378 malate, (G) tyrosine, and (H) b-alanine are represented as scatter plots with the horizontal lines  
379 representing the mean value and standard deviation. \**P* < 0.05. \*\**P* < 0.01. \*\*\**P* < 0.001. *P*-  
380 values calculated using a Kruskal-Wallis tests followed by a Dunn's test. Analysis in (A) and (B)  
381 conducted using MetaboAnalyst 5.0 (see methods).

382

### 383 SUPPLEMENTAL TABLES

384 **Table S1. GC-MS analysis of control, *Gpdh1* zygotic mutants, and *Gpdh1* maternal-zygotic**  
385 **mutants.** Samples contained 25 mid-L2 larvae. Data normalized to sample mass and a d4-  
386 succinic acid internal standard.

387

## 388 LITERATURE CITED

389

- 390 Bewley, G. C., J. M. DeZurik and G. Pagelson, 1980 Analysis of l-glycerol-3-phosphate dehydrogenase  
391 mutants in *Drosophila melanogaster*: complementation for intracellular degradation of the mutant  
392 polypeptide. *Mol Gen Genet* 178: 301-308.
- 393 Burkhart, B. D., E. Montgomery, C. H. Langley and R. A. Voelker, 1984 Characterization of Allozyme  
394 Null and Low Activity Alleles from Two Natural Populations of *DROSOPHILA*  
395 *MELANOGASTER*. *Genetics* 107: 295-306.
- 396 Campbell, J. B., S. Werkhoven and J. F. Harrison, 2019 Metabolomics of anoxia tolerance in *Drosophila*  
397 *melanogaster*: evidence against substrate limitation and for roles of protective metabolites and  
398 paralytic hypometabolism. *Am J Physiol Regul Integr Comp Physiol* 317: R442-R450.
- 399 Carmon, A., J. Chien, D. Sullivan and R. MacIntyre, 2010 The alpha glycerophosphate cycle in *Drosophila*  
400 *melanogaster* V. molecular analysis of alpha glycerophosphate dehydrogenase and alpha  
401 glycerophosphate oxidase mutants. *J Hered* 101: 218-224.
- 402 Casas-Vila, N., A. Bluhm, S. Sayols, N. Dinges, M. Dejung *et al.*, 2017 The developmental proteome of  
403 *Drosophila melanogaster*. *Genome Res* 27: 1273-1285.
- 404 Coquin, L., J. D. Feala, A. D. McCulloch and G. Paternostro, 2008 Metabolomic and flux-balance analysis  
405 of age-related decline of hypoxia tolerance in *Drosophila* muscle tissue. *Mol Syst Biol* 4: 233.
- 406 Davis, M. B., and R. J. MacIntyre, 1988 A genetic analysis of the alpha-glycerophosphate oxidase locus in  
407 *Drosophila melanogaster*. *Genetics* 120: 755-766.
- 408 Feala, J. D., L. Coquin, A. D. McCulloch and G. Paternostro, 2007 Flexibility in energy metabolism  
409 supports hypoxia tolerance in *Drosophila* flight muscle: metabolomic and computational systems  
410 analysis. *Mol Syst Biol* 3: 99.
- 411 Gibson, J. B., A. Cao, J. Symonds and D. Reed, 1991 Low activity sn-glycerol-3-phosphate dehydrogenase  
412 variants in natural populations of *Drosophila melanogaster*. *Heredity (Edinb)* 66 ( Pt 1): 75-82.
- 413 Kotarski, M. A., S. Pickert, D. A. Leonard, G. J. LaRosa and R. J. MacIntyre, 1983 The characterization of  
414 alpha-glycerophosphate dehydrogenase mutants in *Drosophila melanogaster*. *Genetics* 105: 387-  
415 407.
- 416 Lee, Y. J., G. R. Jeschke, F. M. Roelants, J. Thorner and B. E. Turk, 2012 Reciprocal phosphorylation of  
417 yeast glycerol-3-phosphate dehydrogenases in adaptation to distinct types of stress. *Mol Cell Biol*  
418 32: 4705-4717.
- 419 Li, H., M. Rai, K. Buddika, M. C. Sterrett, A. Luhur *et al.*, 2019 Lactate dehydrogenase and glycerol-3-  
420 phosphate dehydrogenase cooperatively regulate growth and carbohydrate metabolism during  
421 *Drosophila melanogaster* larval development. *Development* 146.
- 422 Li, H., and J. M. Tennessen, 2017 Methods for studying the metabolic basis of *Drosophila* development.  
423 Wiley Interdiscip Rev Dev Biol 6.
- 424 Li, H., and J. M. Tennessen, 2018 Preparation of *Drosophila* Larval Samples for Gas Chromatography-  
425 Mass Spectrometry (GC-MS)-based Metabolomics. *J Vis Exp*.
- 426 Liu, R., Y. Feng, Y. Deng, Z. Zou, J. Ye *et al.*, 2021 A HIF1alpha-GPD1 feedforward loop inhibits the  
427 progression of renal clear cell carcinoma via mitochondrial function and lipid metabolism. *J Exp*  
428 *Clin Cancer Res* 40: 188.
- 429 Mahmoudzadeh, N. H., A. J. Fitt, D. B. Schwab, W. E. Martenis, L. M. Nease *et al.*, 2020 The  
430 oncometabolite L-2-hydroxyglutarate is a common product of dipteran larval development. *Insect*  
431 *Biochem Mol Biol* 127: 103493.
- 432 Merritt, T. J., E. Sezgin, C. T. Zhu and W. F. Eanes, 2006 Triglyceride pools, flight and activity variation  
433 at the *Gpdh* locus in *Drosophila melanogaster*. *Genetics* 172: 293-304.
- 434 O'Brien, S. J., and R. J. MacIntyre, 1972a The -glycerophosphate cycle in *Drosophila melanogaster*. I.  
435 Biochemical and developmental aspects. *Biochem Genet* 7: 141-161.

- 436 O'Brien, S. J., and R. J. Macintyre, 1972b The -glycerophosphate in *Drosophila melanogaster*. II. Genetic  
437 aspects. *Genetics* 71: 127-138.
- 438 O'Brien, S. J., and Y. Shimada, 1974 The alpha-glycerophosphate cycle in *Drosophila melanogaster*. IV.  
439 Metabolic, ultrastructural, and adaptive consequences of alphaGpdh-1 "null" mutations. *J Cell Biol*  
440 63: 864-882.
- 441 Orozco, J. M., P. A. Krawczyk, S. M. Scaria, A. L. Cangelosi, S. H. Chan *et al.*, 2020 Dihydroxyacetone  
442 phosphate signals glucose availability to mTORC1. *Nat Metab* 2: 893-901.
- 443 Pang, Z., J. Chong, G. Zhou, D. A. de Lima Morais, L. Chang *et al.*, 2021 MetaboAnalyst 5.0: narrowing  
444 the gap between raw spectra and functional insights. *Nucleic Acids Res* 49: W388-W396.
- 445 Rechsteiner, M. C., 1970 *Drosophila* lactate dehydrogenase and alpha-glycerolphosphate dehydrogenase:  
446 distribution and change in activity during development. *J Insect Physiol* 16: 1179-1192.
- 447 Rusu, P., C. Shao, A. Neuerburg, A. A. Acikgoz, Y. Wu *et al.*, 2019 GPD1 Specifically Marks Dormant  
448 Glioma Stem Cells with a Distinct Metabolic Profile. *Cell Stem Cell* 25: 241-257 e248.
- 449 Sacktor, B., and A. Dick, 1962 Pathways of hydrogen transport in the oxidation of extramitochondrial  
450 reduced diphosphopyridine nucleotide in flight muscle. *J Biol Chem* 237: 3259-3263.
- 451 Sato, T., Y. Yoshida, A. Morita, N. Mori and S. Miura, 2016 Glycerol-3-phosphate dehydrogenase 1  
452 deficiency induces compensatory amino acid metabolism during fasting in mice. *Metabolism* 65:  
453 1646-1656.
- 454 Sullivan, D. T., F. A. Donovan and G. Skuse, 1983 Developmental regulation of glycerol-3-phosphate  
455 dehydrogenase synthesis in *Drosophila*. *Biochem Genet* 21: 49-62.
- 456 Tennessen, J. M., W. E. Barry, J. Cox and C. S. Thummel, 2014a Methods for studying metabolism in  
457 *Drosophila*. *Methods* 68: 105-115.
- 458 Tennessen, J. M., N. M. Bertagnolli, J. Evans, M. H. Sieber, J. Cox *et al.*, 2014b Coordinated metabolic  
459 transitions during *Drosophila* embryogenesis and the onset of aerobic glycolysis. *G3 (Bethesda)* 4:  
460 839-850.
- 461 Wojtas, K., N. Slepecky, L. von Kalm and D. Sullivan, 1997 Flight muscle function in *Drosophila* requires  
462 colocalization of glycolytic enzymes. *Mol Biol Cell* 8: 1665-1675.
- 463 Wright, D. A., and C. R. Shaw, 1969 Genetics and ontogeny of alpha-glycerophosphate dehydrogenase  
464 isozymes in *Drosophila melanogaster*. *Biochem Genet* 3: 343-353.
- 465 Wright, D. A., and C. R. Shaw, 1970 Time of expression of genes controlling specific enzymes in  
466 *Drosophila* embryos. *Biochem Genet* 4: 385-394.
- 467 Xia, R., H. Tang, J. Shen, S. Xu, Y. Liang *et al.*, 2021 Prognostic value of a novel glycolysis-related gene  
468 expression signature for gastrointestinal cancer in the Asian population. *Cancer Cell Int* 21: 154.
- 469 Yamaguchi, Y., T. S. Takano, T. Yamazaki and K. Harada, 1994 Molecular analysis of Gpdh null mutations  
470 that arose in mutation accumulation experiments in *Drosophila melanogaster*. *Heredity (Edinb)* 73  
471 (Pt 4): 397-404.
- 472 Zhou, C., J. Yu, M. Wang, J. Yang, H. Xiong *et al.*, 2017 Identification of glycerol-3-phosphate  
473 dehydrogenase 1 as a tumour suppressor in human breast cancer. *Oncotarget* 8: 101309-101324.
- 474

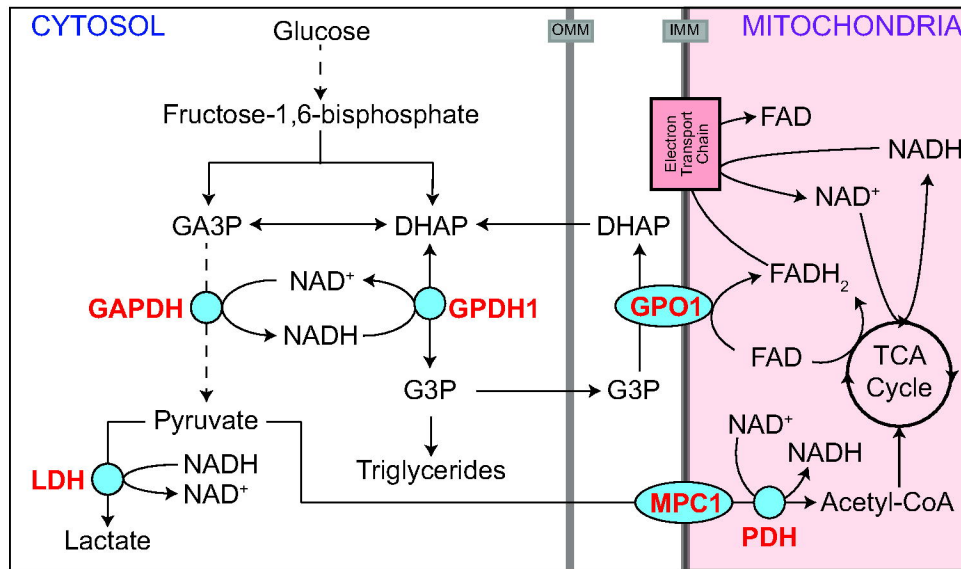

**Figure 1. GPDH1 promotes cytosolic redox balance, ATP production, and TAG accumulation.** A schematic diagram illustrating the role of GPDH1 in central carbon metabolism. GPDH1 relies on the cofactor NAD<sup>+</sup>/NADH to interconvert the glycolytic intermediate dihydroxyacetone phosphate (DHAP) to glycerol 3-phosphate (G3P). In *Drosophila* larvae, the GPDH1-dependent conversion of DHAP to G3P functions in parallel with Lactate Dehydrogenase (LDH) to maintain redox balance. G3P is used as a precursor for TAG synthesis and functions in the G3P electron shuttle to transfer reducing equivalents to the electron transport chain. In adult flight muscle, GPDH1 function in conjunction with GPO1 and the tricarboxylic acid (TCA) cycle to generate the ATP required for flight. Abbreviations: dihydroxyacetone phosphate (DHAP), glyceraldehyde-3-phosphate (GA3P), glycerol-3-phosphate (G3P), glycerol-3-phosphate dehydrogenase (GPDH1), glycerophosphate oxidase 1 (GPO1), lactate dehydrogenase (LDH), mitochondrial pyruvate carrier 1 (MPC1), pyruvate dehydrogenase (PDH), tricarboxylic acid (TCA).

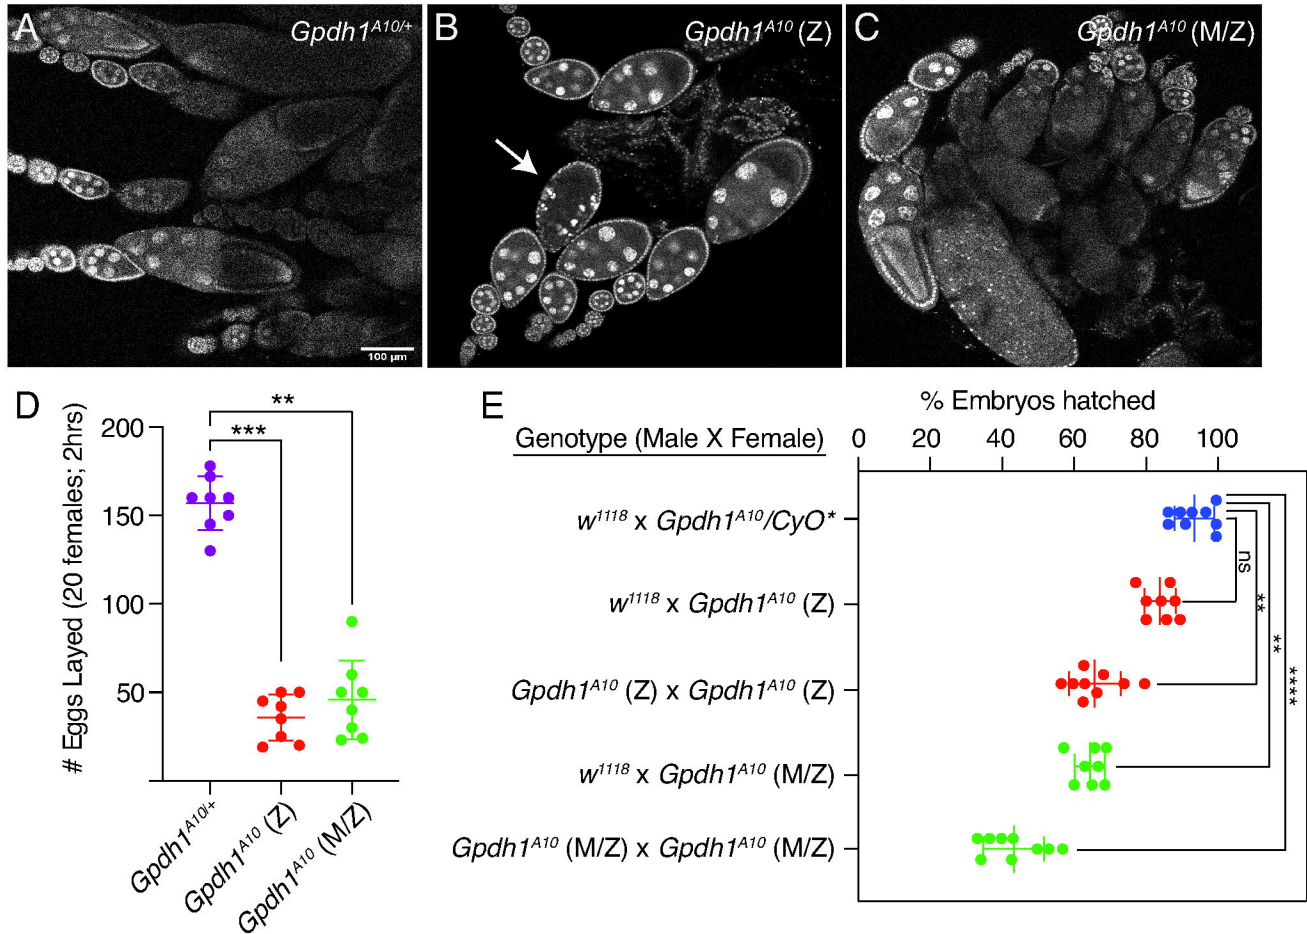

**Figure 2. *Gpdh1* is required for oocyte development and embryonic viability.** (A-C) Ovaries were dissected from 3-day old females and stained with DAPI. When compare to the *Gpdh1<sup>A10/+</sup>* control strain (A), the ovaries of (B) F1 generation *Gpdh1<sup>A10</sup>* mutants and (C) *Gpdh1<sup>A10</sup> M/Z* mutants display (B,C) fewer later stage oocytes and (B) degenerating egg chambers (see arrow). (D) The fecundity of F1 generation *Gpdh1<sup>A10</sup>* mutants and *Gpdh1<sup>A10</sup> M/Z* mutants are significantly decreased when compared with controls. (E) Embryos produced by either F1 generation *Gpdh1<sup>A10</sup>* mutants or *Gpdh1<sup>A10</sup> M/Z* mutants exhibit significant mortality when compared with the controls and independent of paternal genotype. \* $P < 0.05$ . \*\* $P < 0.01$ . \*\*\* $P < 0.001$ .  $P$ -values calculated using a Kruskal-Wallis tests followed by a Dunn's test.

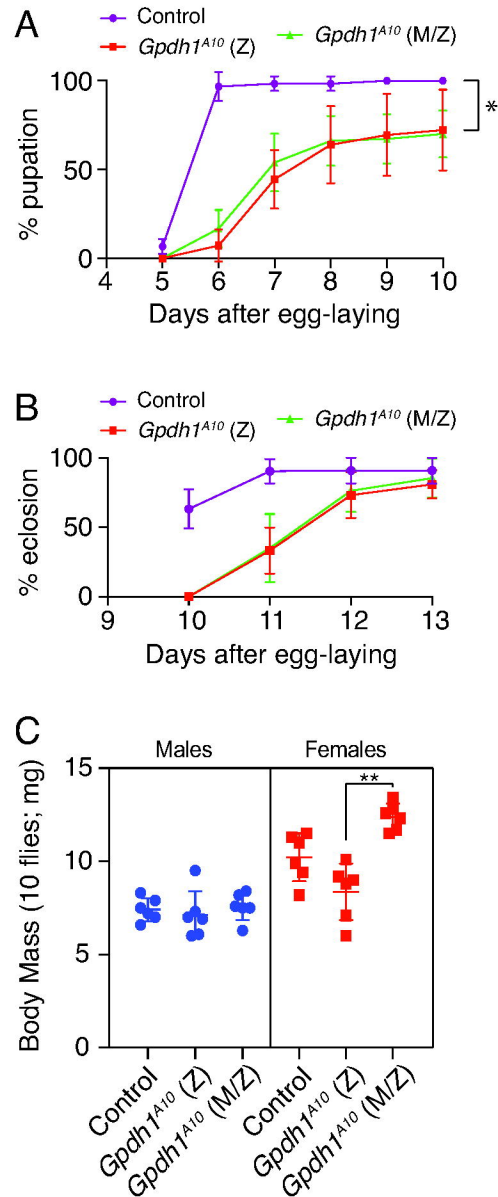

**Figure 3. *Gpdh1* zygotic and *Gpdh1* maternal-zygotic mutants exhibit similar developmental delays.** *Gpdh1<sup>A10/+</sup>* controls, F1 generation *Gpdh1<sup>A10</sup>* mutants, and *Gpdh1<sup>A10</sup>* M/Z mutants were analyzed for (A) time from egg-laying to pupariation, (B) time from egg-laying to eclosion, and (C) body mass one day after eclosion. For (B), the % eclosion value represents the percent of pupae that successfully eclosed and does not include the 20% of larvae that failed to pupariate. \*\* $P < 0.01$ .  $P$ -values calculated using a Kruskal-Wallis tests followed by a Dunn's test.



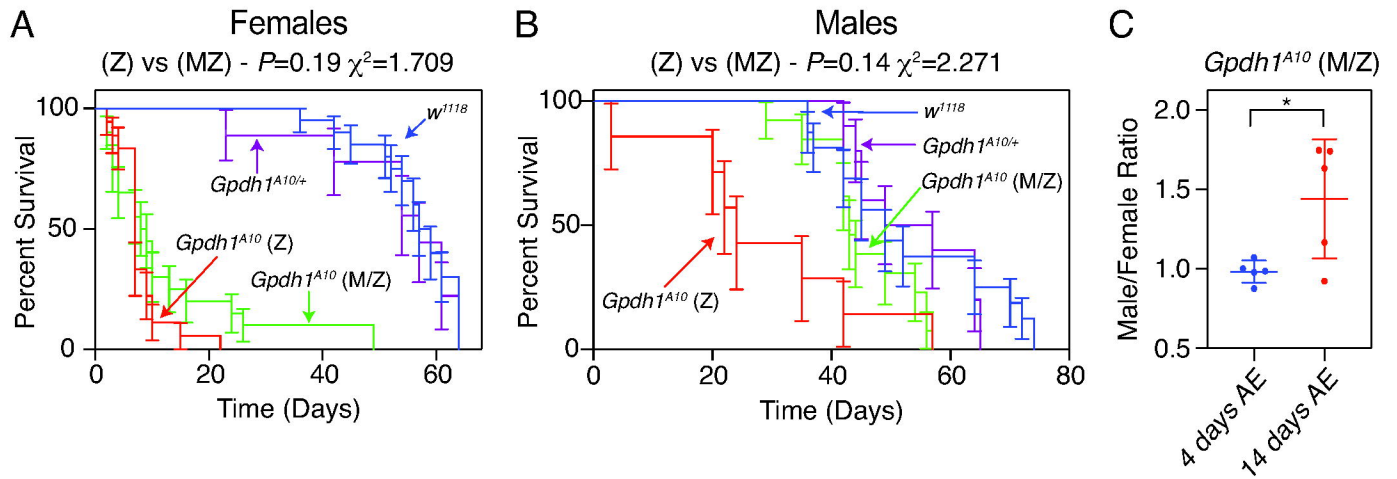

**Figure 4. *Gpdh1* mutant females are short-lived.** The lifespan of (A) females and (B) males from *Gpdh1*<sup>A10/+</sup> heterozygous controls, F1 generation *Gpdh1*<sup>A10</sup> mutants, and a *Gpdh1*<sup>A10</sup> M/Z mutant strain were analyzed for 80 days after eclosion. Longevity data was analyzed using a log-rank (Mantel-Cox) test. (C) Ratio of males to females in culture bottles either 2 or 14 days after eclosion. \* $P < 0.05$ .  $P$ -values calculated using an unpaired t-test.

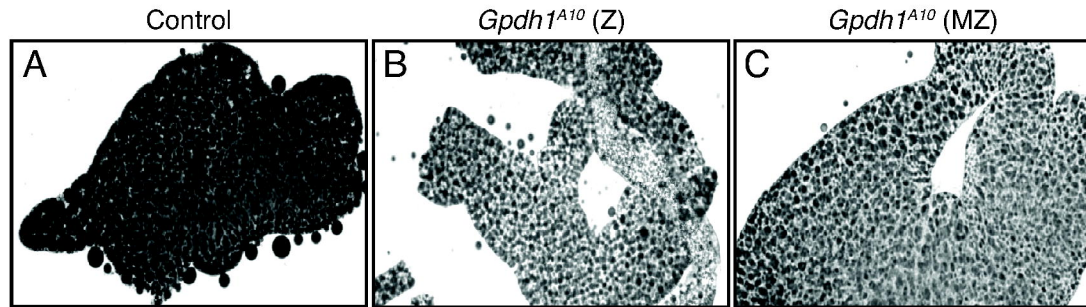

**Figure 5. TAG levels are significantly decreased in *Gpdh1* mutants.** Representative images of mid-L2 fat bodies stained with Black Solvent 2 and imaged using bright field microscopy. When compared with (A) heterozygous *Gpdh1<sup>A10/+</sup>* control, both (B) F1 generation *Gpdh1<sup>A10</sup>* mutants (C) a *Gpdh1<sup>A10</sup>* M/Z mutant strain exhibit a similar decrease in lipid levels.

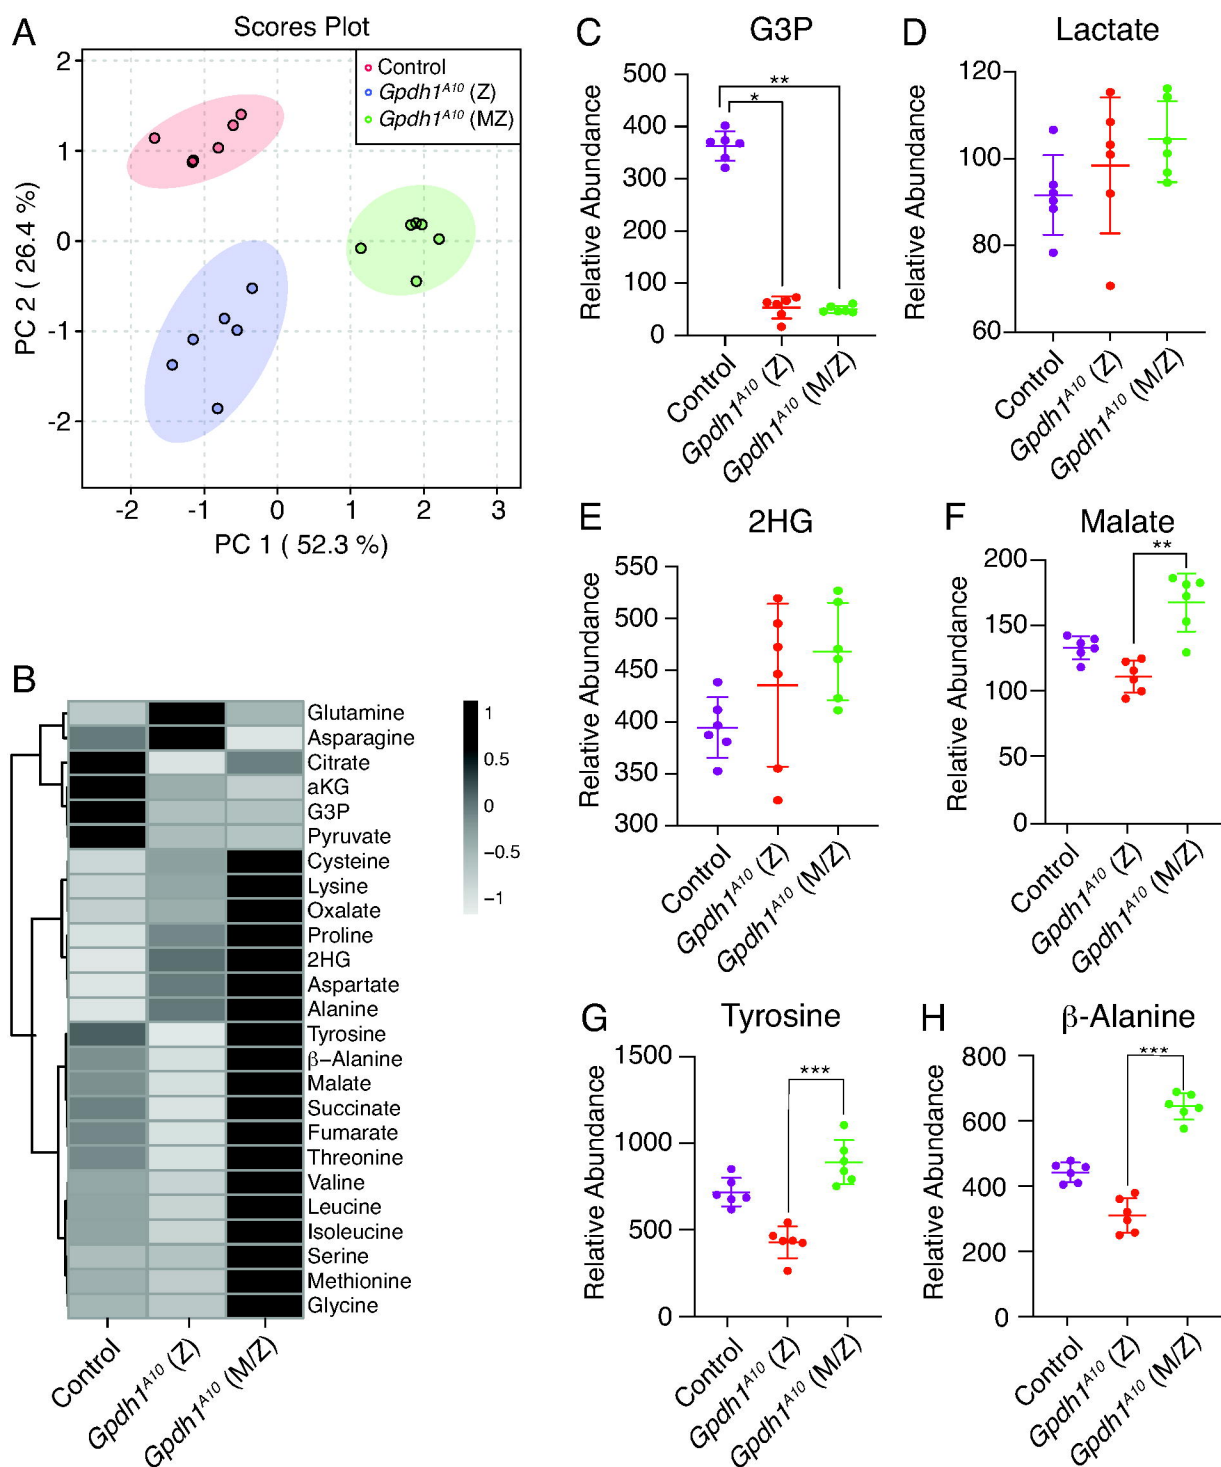

**Figure 6. Metabolomic analysis of *Gpdh1* zygotic and *Gpdh1* maternal-zygotic mutants.** A targeted GC-MS-based metabolomics method was used to compare the relative abundance of G3P, lactate, 2HG and amino acids, between heterozygous *Gpdh1<sup>A10/+</sup>* controls, *Gpdh1<sup>A10</sup>* zygotic mutants and *Gpdh1<sup>A10</sup>* maternal-zygotic mutants. (A) PCA plot showing that the control, F1 generation *Gpdh1* mutants (Z), and the *Gpdh1* M/Z mutant strain separate clearly in their metabolomic profile. (B) Heatmap showing the increase in the relative abundance of amino acids in *Gpdh1* M/Z mutants when compared to the F1 generation *Gpdh1* zygotic mutants and the *Gpdh1<sup>A10/+</sup>* controls. (C-H) The relative abundance of (C) G3P, (D) lactate, and (E) 2HG, (F) malate, (G) tyrosine, and (H) β-alanine are represented as scatter plots with the horizontal lines representing the mean value and standard deviation. \* $P < 0.05$ . \*\* $P < 0.01$ . \*\*\* $P < 0.001$ .  $P$ -values calculated using a Kruskal-Wallis tests followed by a Dunn's test. Analysis in (A) and (B) conducted using MetaboAnalyst 5.0 (see methods).
